# Supplementary material
Source: publisher figshare collection journal article supplement (https://acs.figshare.com/ndownloader/files/4742260)
Supplement: Supplementary file 1 [file 4742260]

**Table I.** Antifungal peptides activity<sup>1,2</sup> against fungal strains determined by the broth microdilution method.

| Antifungal agent | Yeasts                              |                        |                        |           |
|------------------|-------------------------------------|------------------------|------------------------|-----------|
|                  | <i>C.albicans</i> ATCC 10231        |                        | <i>C.albicans</i> SA40 |           |
|                  | IC <sub>50</sub> <sup>1</sup> µg/ml | MFC <sup>2</sup> µg/ml | IC <sub>50</sub> µg/ml | MFC µg/ml |
| Histatin 5       | 6.25 <sup>3</sup>                   | 12.5                   | 6.25                   | 12.5      |
| ATCUN-C16        | 6.25                                | 12.5                   | 6.5                    | 12.5      |

<sup>1</sup> Growth inhibition obtained with fungal pathogens yeasts in the presence of synthetic proteins. Fungal cells (1×10<sup>4</sup>CFU/ml) were incubated with a dilution series of proteins in SDB (10%) supplemented with dialysed yeast extract, and growth inhibition was assessed spectrophotometrically at 620nm after 48 of incubation at 30 C (Helmerhorst E.J.,Venuleo C., Beri A., Oppenheim F.G.,Yeast 2005;22:705-14). The IC<sub>50</sub> values corresponded to the concentration of proteins that inhibited the maximum growth of that particular strain by 50%.

<sup>2</sup> Cells were exposed to a dilution series of synthetic proteins in 10% SDB, pH7.0, after which cells were plated on SDA and incubated at 37 C for 48h. Cell viability was determined by colony counting. The minimum fungicidal concentration (MFC) was the lowest drug concentration resulting in the death of 99.9% or more of the initial inoculum.

<sup>3</sup> Average of three replicate experiments, each performed in duplicate.

**Table II.**  $^1J_{\text{C}\alpha\text{H}\alpha}$  values in Hz for the ACTUN-C16 peptide measured at 25°C in a 1:1 TFE:H<sub>2</sub>O solution, pH 6.0.<sup>a</sup>

| Residue    | $^1J_{\text{C}\alpha\text{H}\alpha}$ (Hz) |
|------------|-------------------------------------------|
| <b>D1</b>  | 142.50                                    |
| <b>S2</b>  | 142.10                                    |
| <b>H3</b>  | 144.20                                    |
| <b>A4</b>  | 144.20                                    |
| <b>G5</b>  | nd <sup>b</sup>                           |
| <b>Y6</b>  | 147.00                                    |
| <b>K7</b>  | 144.60                                    |
| <b>R8</b>  | 146.00                                    |
| <b>K9</b>  | 145.50                                    |
| <b>F10</b> | 146.80                                    |
| <b>H11</b> | 147.10                                    |
| <b>E12</b> | 144.10                                    |
| <b>K13</b> | 145.60                                    |
| <b>H14</b> | 145.60                                    |
| <b>H15</b> | 145.00                                    |
| <b>S16</b> | 143.60                                    |
| <b>H17</b> | 143.70                                    |
| <b>R18</b> | 141.80                                    |
| <b>G19</b> | nd <sup>b</sup>                           |
| <b>Y20</b> | 142.90                                    |

<sup>a</sup>: Coupling constants are reported with an accuracy of  $\pm 0.5$  Hz.

<sup>b</sup>: nd: not determined.

**Table III.**  $^1\text{H}$  and  $^{13}\text{C}$  Chemical Shifts Assignments of the ACTUN-C16 peptide in a 1:1 TFE:H<sub>2</sub>O solution at 25°C and pH 6.0.<sup>a</sup>

| Residue    | $^{15}\text{N}$ | NH   | $^{13}\text{C}_\alpha$ | $^1\text{H}_\alpha$ | $^{13}\text{C}_\beta$ | $^1\text{H}_\beta$ | Others <sup>b</sup>                                                               |
|------------|-----------------|------|------------------------|---------------------|-----------------------|--------------------|-----------------------------------------------------------------------------------|
| <b>D1</b>  | -               | -    | 51.9                   | 3.97                | 49.5                  | 2.69/2.69          |                                                                                   |
| <b>S2</b>  | 116.7           | 7.92 | 57.1                   | 4.37                | 61.42                 | 3.82/3.82          |                                                                                   |
| <b>H3</b>  | 118.0           | 7.98 | 55.2                   | 4.60                | 28.0                  | 3.11/3.24          |                                                                                   |
| <b>A4</b>  | 122.6           | 7.98 | 52.4                   | 4.09                | 16.0                  | 1.43               |                                                                                   |
| <b>G5</b>  | 105.5           | 8.36 | 44.3                   | 3.83/3.83           | -                     | -                  |                                                                                   |
| <b>Y6</b>  | 120.5           | 7.78 | 58.2                   | 4.28                | 35.9                  | 3.07/3.07          |                                                                                   |
| <b>K7</b>  | 119.0           | 7.98 | 57.1                   | 4.00                | 30.1                  | 1.86/1.86          | $\gamma$ 23.2 (1.38/1.55), $\delta$ 27.2 (1.66/1.66), $\epsilon$ 39.7 (2.91/2.91) |
| <b>R8</b>  | 119.0           | 7.89 | 56.5                   | 4.12                | 25.0                  | 1.72/1.64          | $\gamma$ 27.7 (1.90/1.90), $\delta$ 41.0 (3.15/3.15)                              |
| <b>K9</b>  | 118.8           | 7.89 | 56.0                   | 4.10                | 29.6                  | 1.82/1.82          | $\gamma$ 22.5 (1.40/1.44), $\delta$ 26.4 (1.63/1.63), $\epsilon$ 39.7 (2.89/2.89) |
| <b>F10</b> | 119.4           | 8.28 | 58.5                   | 4.20                | 36.7                  | 3.12/2.96          |                                                                                   |
| <b>H11</b> | 118.5           | 8.21 | 57.1                   | 4.34                | 28.1                  | 3.23/3.23          |                                                                                   |
| <b>E12</b> | 119.2           | 8.31 | 56.4                   | 4.03                | 27.7                  | 2.11 /2.24         | $\gamma$ 34.1 (2.46/2.24)                                                         |
| <b>K13</b> | 118.6           | 8.01 | 55.5                   | 4.08                | 30.2                  | 1.68/1.74          | $\gamma$ 22.2 (1.26/1.41), $\delta$ 26.6 (1.55/1.55), $\epsilon$ 39.7 (2.88/2.88) |
| <b>H14</b> | 118.8           | 7.89 | 55.7                   | 4.36                | 28.0                  | 2.94/2.73          |                                                                                   |
| <b>H15</b> | 119.0           | 7.98 | 54.9                   | 4.49                | 28.0                  | 2.94/2.94          |                                                                                   |
| <b>S16</b> | 114.6           | 7.95 | 57.1                   | 4.35                | 61.7                  | 3.86/3.83          |                                                                                   |
| <b>H17</b> | 118.3           | 7.97 | 54.4                   | 4.55                | 27.8                  | 3.13/3.03          |                                                                                   |
| <b>R18</b> | 120.2           | 7.95 | 54.1                   | 4.24                | 28.5                  | 1.73/1.64          | $\gamma$ 24.4 (1.42/1.42), $\delta$ 41.0 (3.01/3.01)                              |
| <b>G19</b> | 108.0           | 8.14 | 42.9                   | 3.96/3.74           | -                     | -                  |                                                                                   |
| <b>Y20</b> | 122.8           | 7.29 | 56.6                   | 4.39                | 36.7                  | 2.91/3.02          |                                                                                   |

<sup>a</sup>:  $^1\text{H}$  Chemical shifts are reported in ppm with an accuracy of  $\pm 0.02$  ppm.  $^{13}\text{C}$  Chemical shifts are reported in ppm with an accuracy of  $\pm 0.1$  ppm.

<sup>b</sup>: Carbon chemical shifts first, in brackets the proton chemical shift.

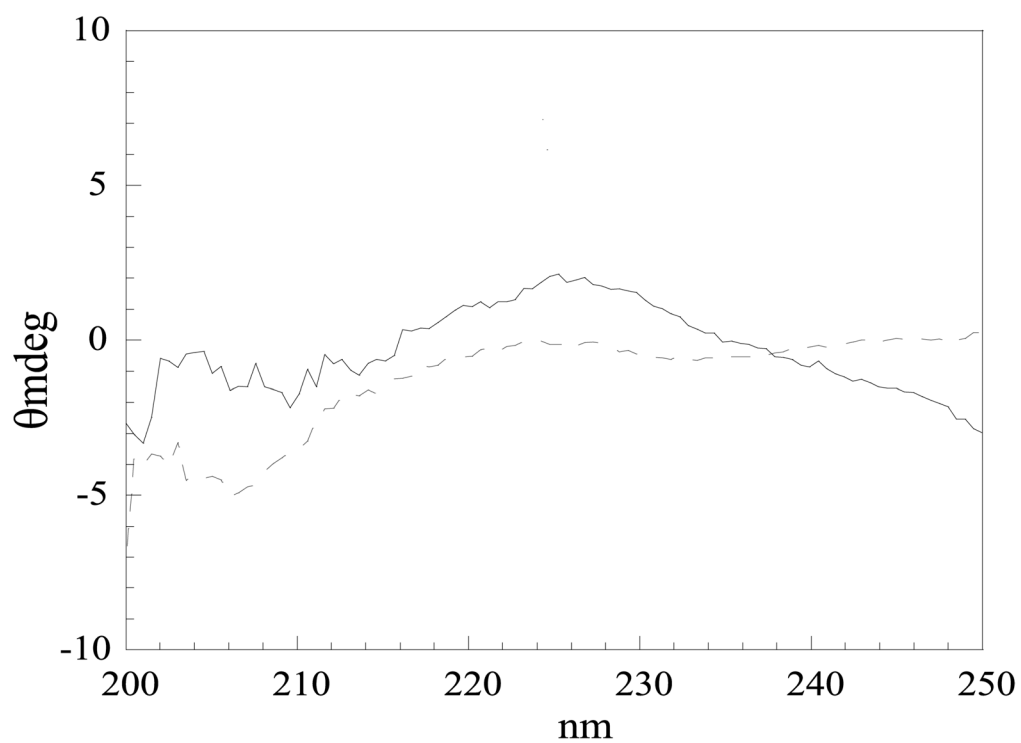

**Fig. 1** Circular dichroism spectra of the peptide with or without the plasmid DNA. CD spectra of ATCUN-C16 (50  $\mu$ M) in presence (—) and in absence (- - -) of pDNA (Peptide/DNA 1:1 w/w) in 17mM Tris-HCl, pH 7.4, buffer. The ATCUN-C16-pDNA spectrum was subtracted of the contribution of the free pDNA.

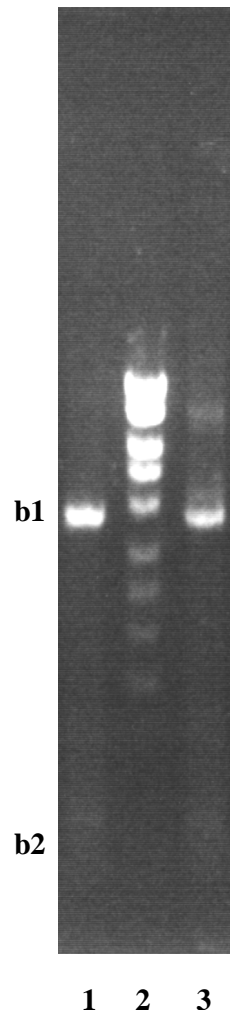

**Fig. 2** Agarose gel electrophoresis (1% agarose) of the 0.25  $\mu\text{g}$  pQE30-rhdA after cleavage with SmaI (1U/ $\mu\text{g}$ ) for 1h at 30°C, in the absence (lane 1) and in the presence (lane 3) of RTN32 peptide, in a ratio pDNA/peptide 1:10 w/w. **b<sub>1</sub>** and **b<sub>2</sub>** bands correspond to the SmaI digest fragments of about 3900 bp and 600 bp respectively. Molecular weight markers are shown in the lane 2.

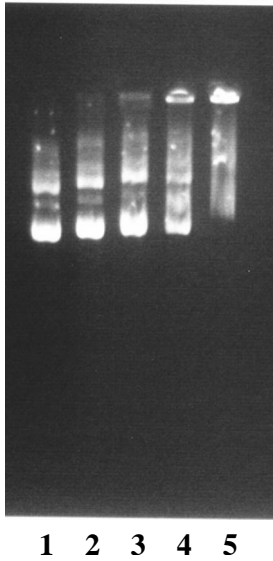

**Fig. 3** Gel retardation shift assay at different Hst5/pDNA w/w ratios, using 0.9  $\mu$ g pQE30-rhda and 1% agarose gel. Lane 1 (0), lane 2 (0.5), lane 3 (1), lane 4 (2) and lane 5 (5).

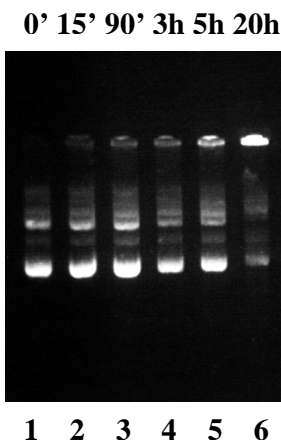

**Fig. 4** Agarose gel electrophoresis of pDNA treated with ATCUN-C16 peptide in 50 mM Tris-HCl buffer, pH 7.5, lanes 0-6 pDNA/ATCUN-C16 peptide mixture (ratio 1:1 w/w) in the presence of  $\text{ZnCl}_2$  (ATCUN-C16: $\text{Zn}^{2+}$  1:1 c/c) at different times (0, 15', 90', 3h, 5h and 20h).

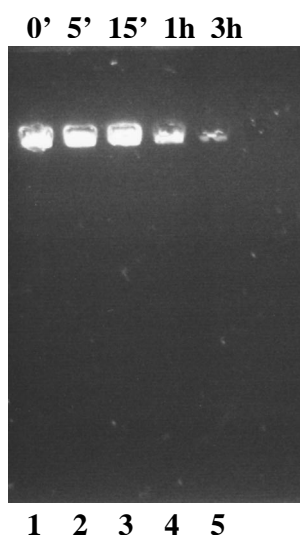

**Fig. 5** Agarose gel electrophoresis of pDNA treated with ATCUN-C16 peptide in 50 mM Tris-HCl buffer, pH 7.5, A) pDNA/ATCUN-C16 peptide mixture (ratio 1:1 w/w) in the presence of  $\text{NiCl}_2$  and magnesium-monoperoxyphthalate (MMPP), at a molar ratio peptide/ $\text{Ni}^{2+}$ / MMPP 1:1:10 c/c/c, incubated for 0 (lane 1), 5 (lane 2), 15 (lane 3), 60 (lane 4), 180 (lane 5) min at 37° C.

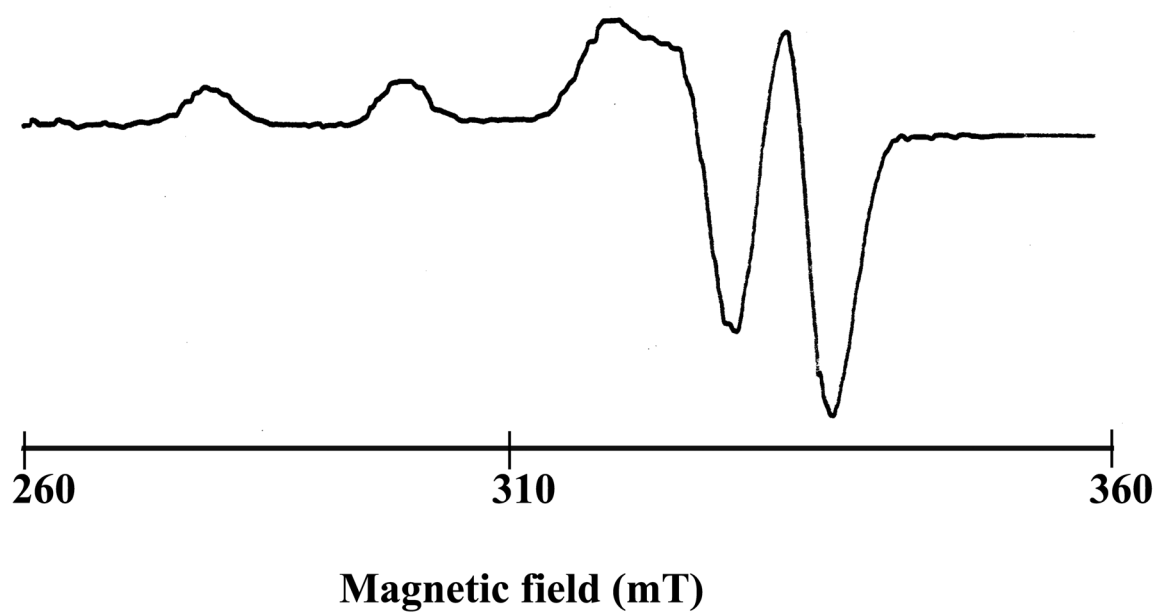

**Fig.6** Low-temperature EPR spectrum of Cu-ATCUN-C16 complex, 1:1 Cu/peptide molar ratio, in 50mM Hepes pH 7.2 buffer.
